# Supplementary material
Source: Springer Nature journal article supplement (https://www.springermedizin.de/resource/supplementary/13561_2012_31_MOESM1_ESM.pdf/9687272)

Medicines Health fortification Medical supplies & appliances Medical services

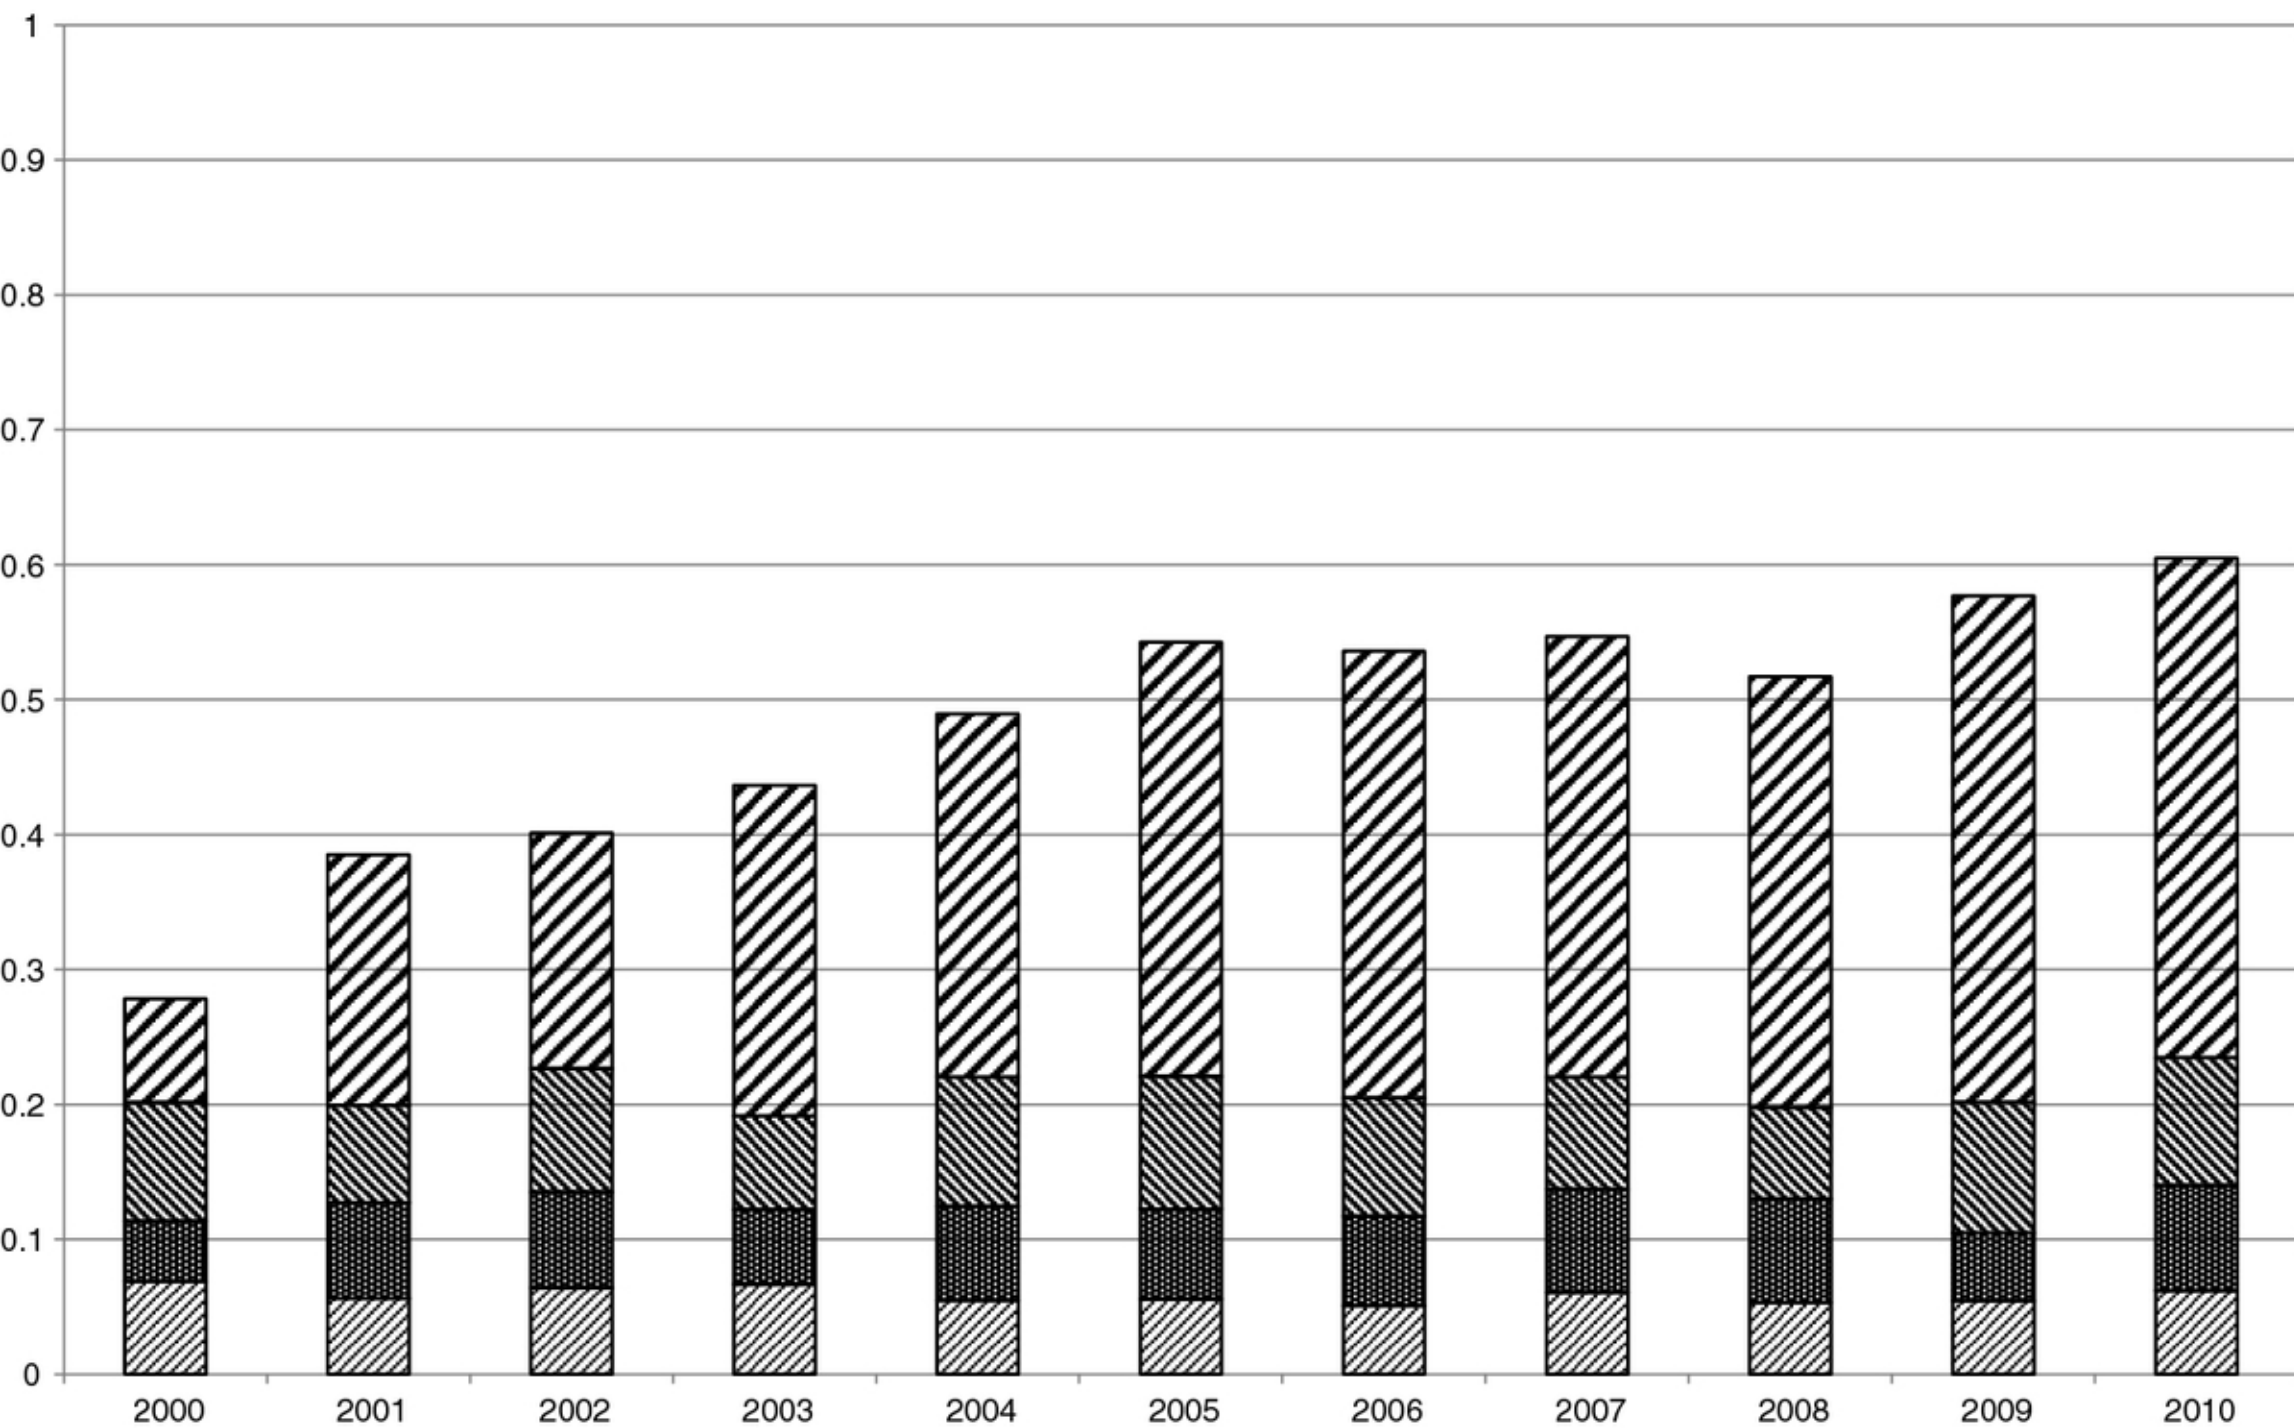

Supplement: MOESM1 [file 9687272]
